# Supplementary material
Source: PubMed Central journal article supplement (PMC10571488)

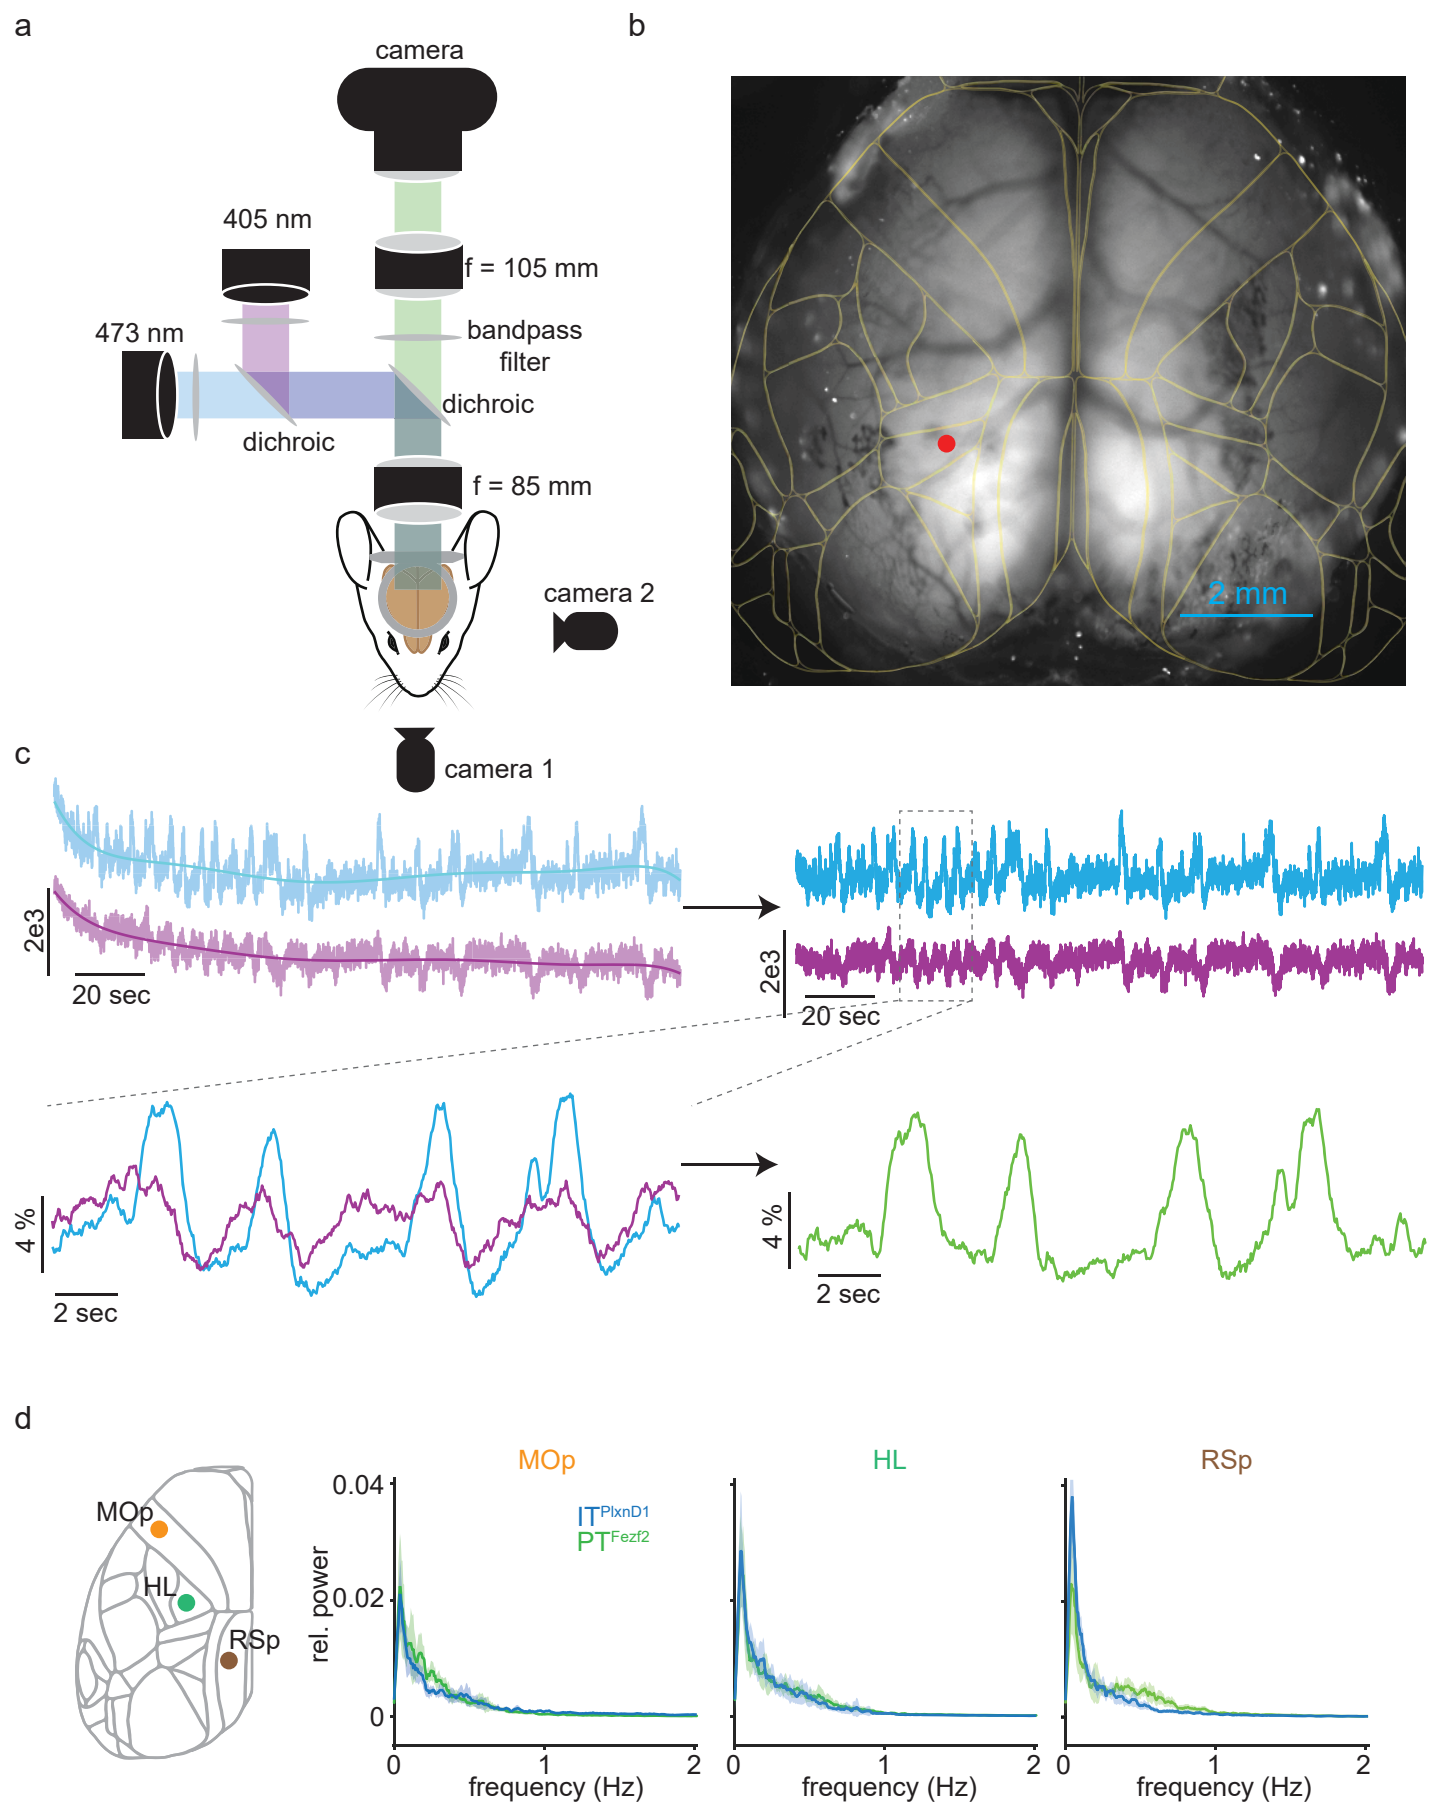

supplementary figure 1

Supplement: NIHMS1933726-supplement-suppl_fig_1.pdf [file NIHMS1933726-supplement-suppl_fig_1.pdf]

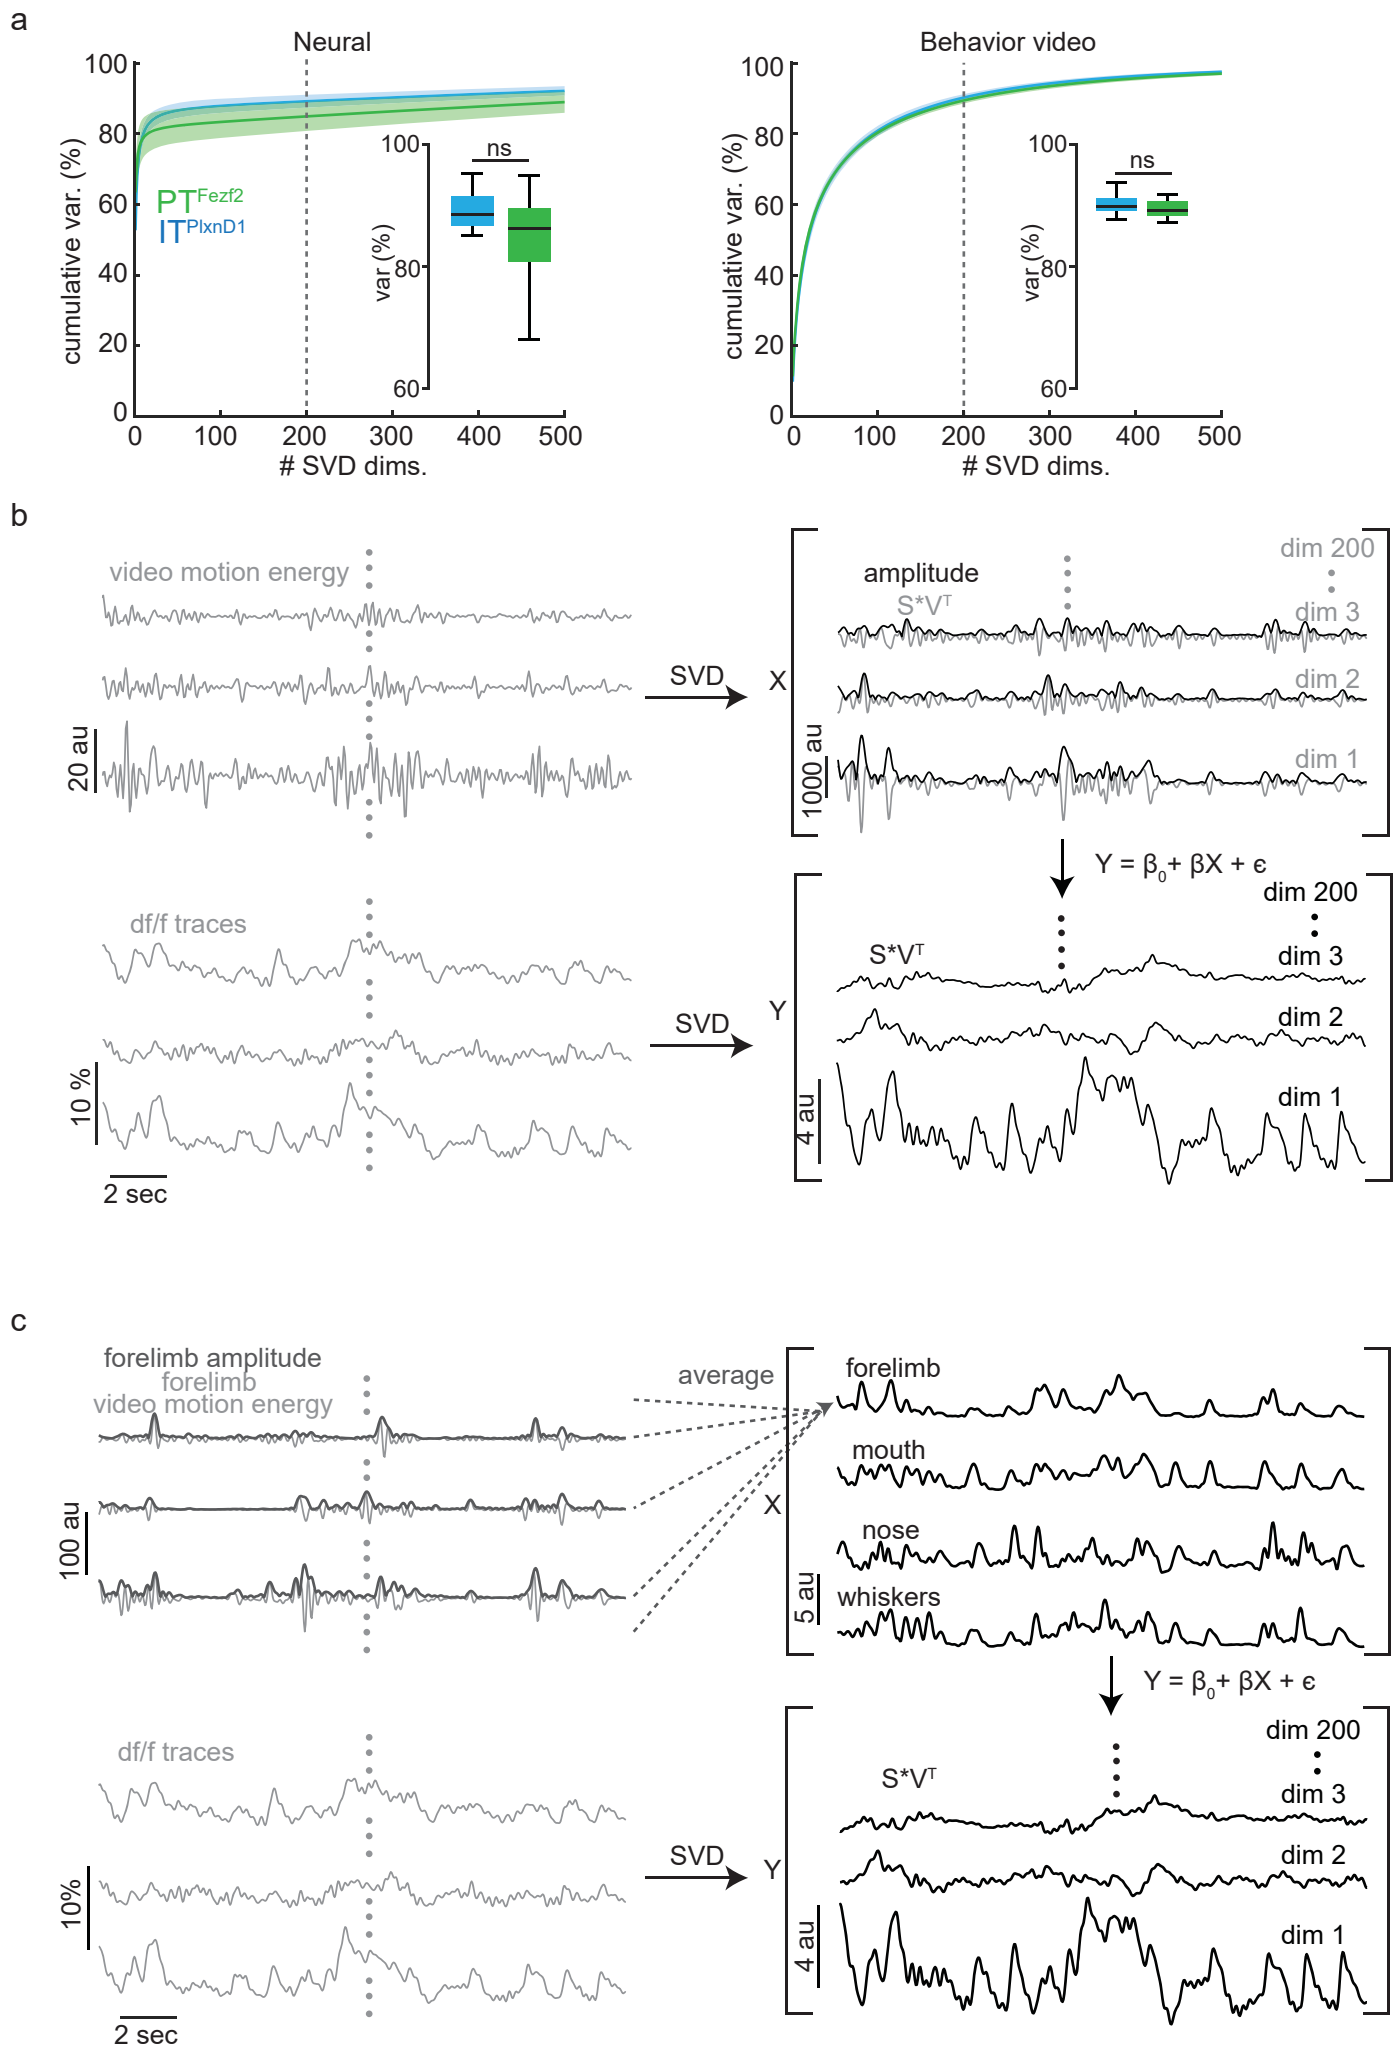

supplementary figure 2

Supplement: NIHMS1933726-supplement-suppl_fig_2.pdf [file NIHMS1933726-supplement-suppl_fig_2.pdf]

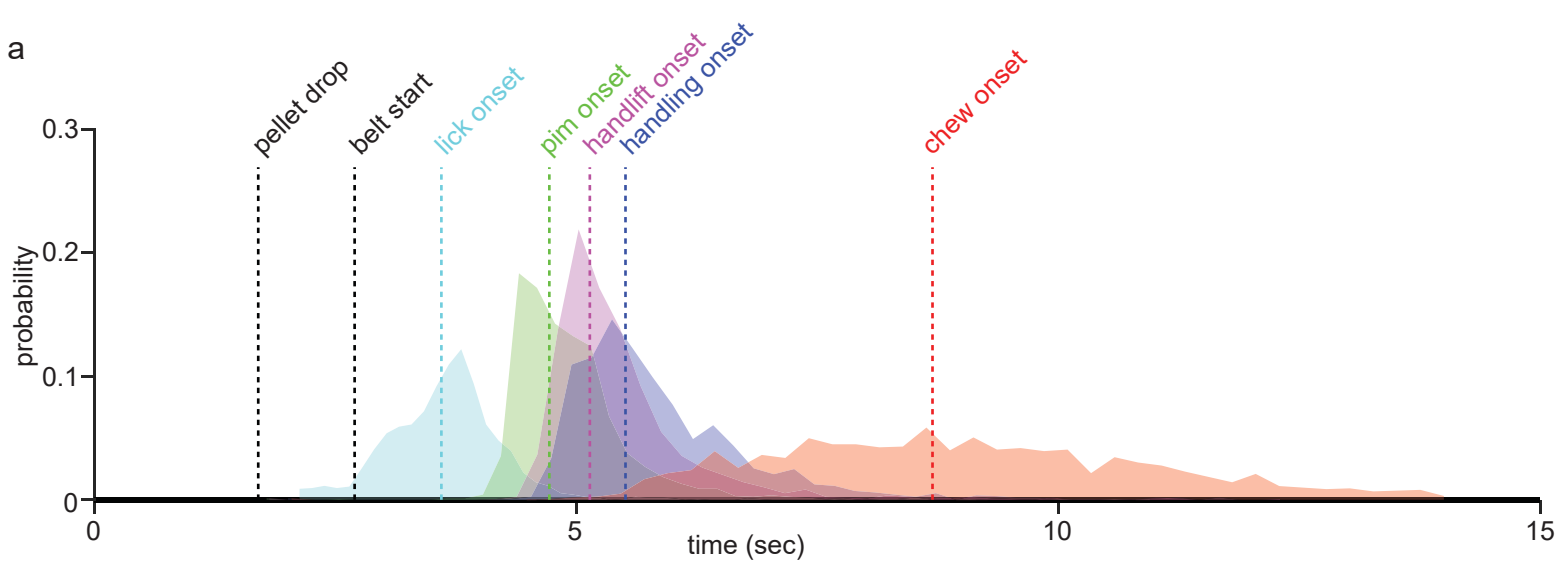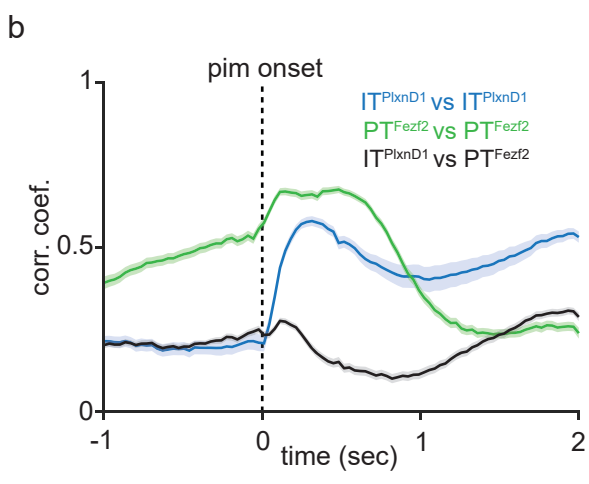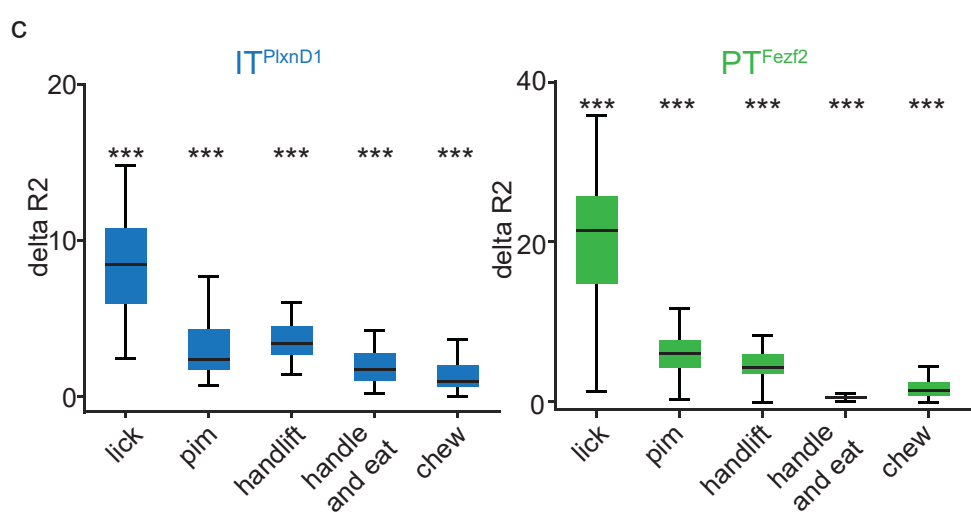

supplementary figure 3

Supplement: NIHMS1933726-supplement-suppl_fig_3.pdf [file NIHMS1933726-supplement-suppl_fig_3.pdf]

a

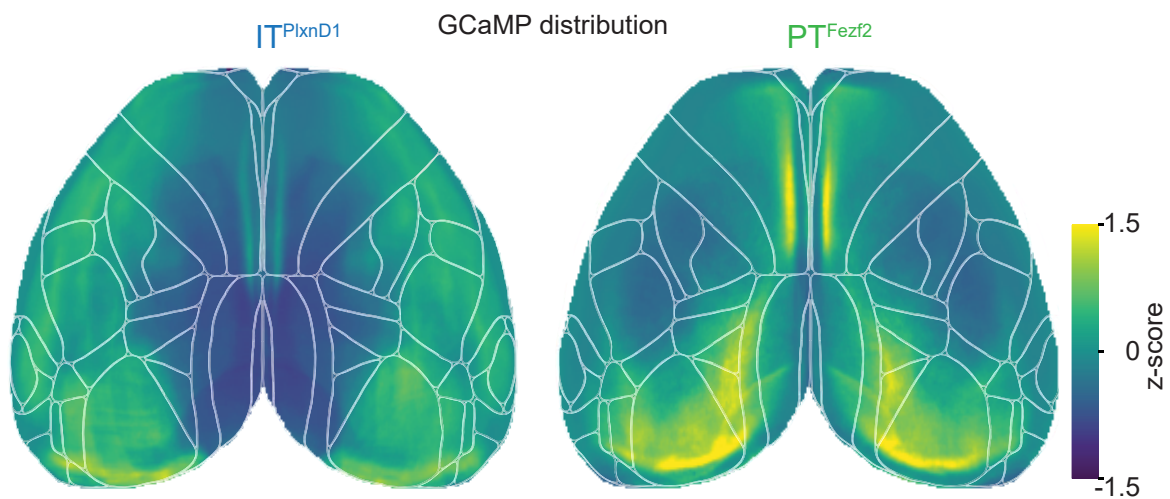

b

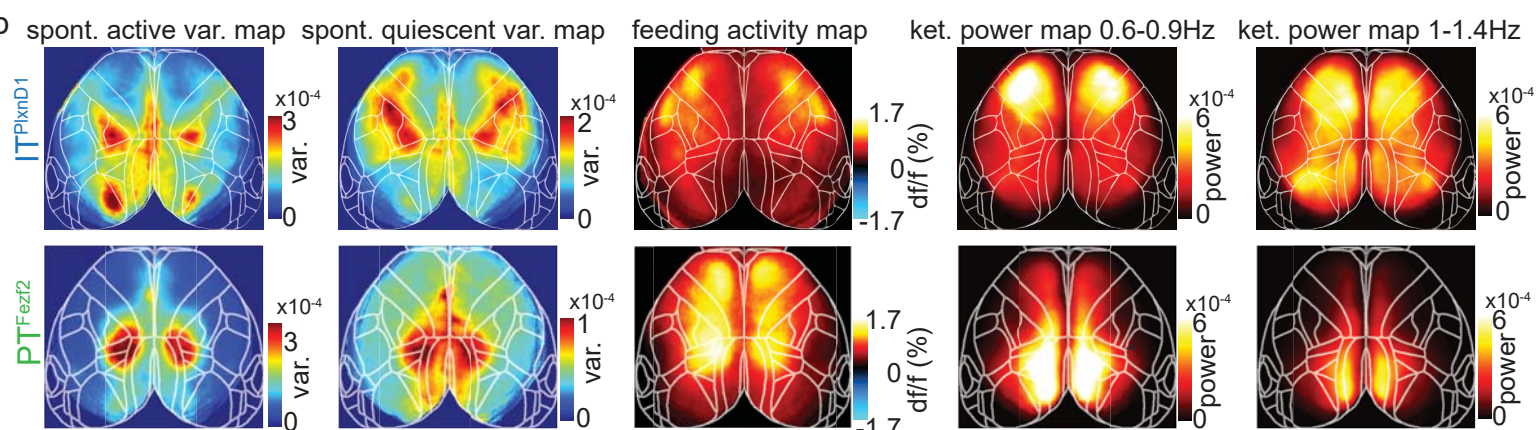

c

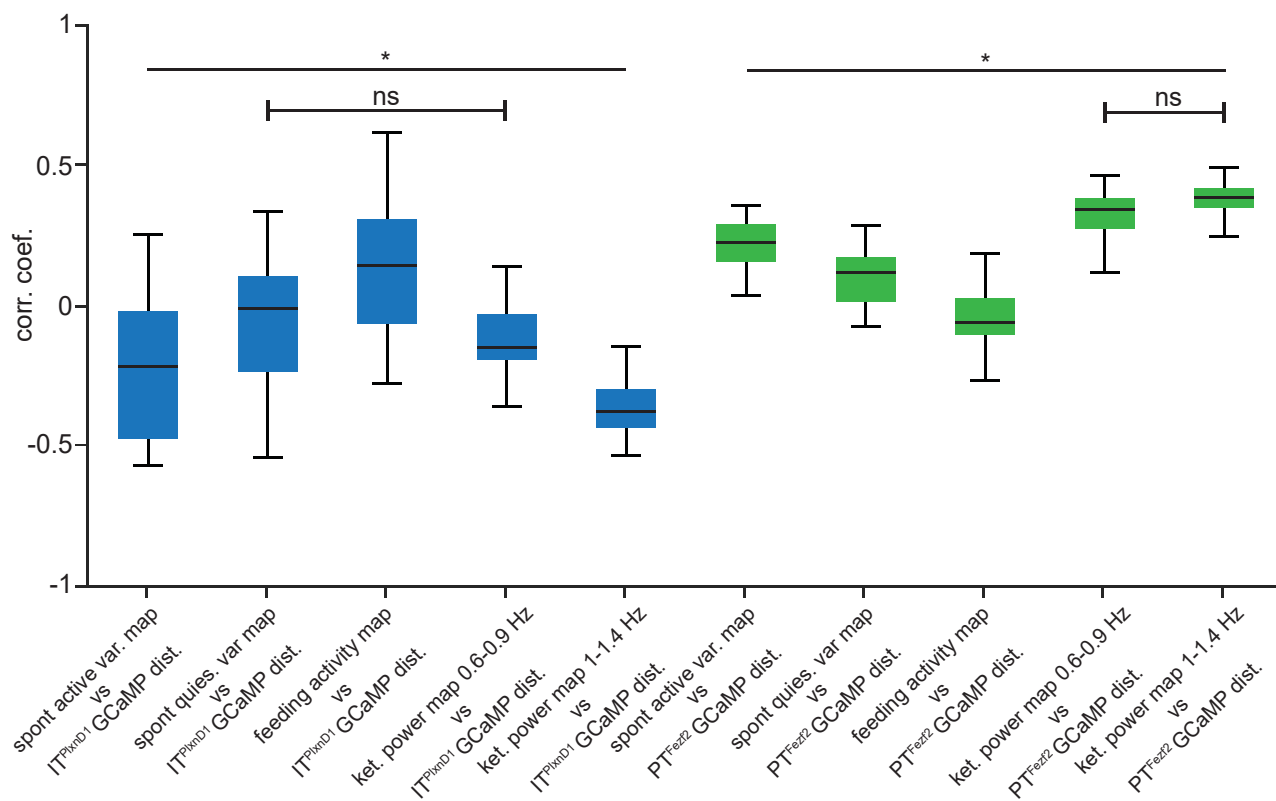

supplementary figure 4

Supplement: NIHMS1933726-supplement-suppl_fig_4.pdf [file NIHMS1933726-supplement-suppl_fig_4.pdf]
